# Supplementary material for: Human impacts as the main driver of tropical forest carbon
Source: PubMed Central journal article supplement — Sci Adv. 2022 Jun 17;8(24):eabl7968. doi: 10.1126/sciadv.abl7968 (PMC9205592; doi:10.1126/sciadv.abl7968), 2022-06-17
Supplement: sciadv.abl7968_sm.pdf [file sciadv.abl7968_sm.pdf]

Supplementary Materials for  
**Human impacts as the main driver of tropical forest carbon**

Marcela Venelli Pyles *et al.*

Corresponding author: Marcela Venelli Pyles, marcelav.pyles@gmail.com; Luiz Fernando Silva Magnago, luizmagnago@gmail.com; Renato A. F. Lima, raflima@usp.br

*Sci. Adv.* **8**, eabl7968 (2022)  
DOI: 10.1126/sciadv.abl7968

**The PDF file includes:**

Supplementary Text  
Figs. S1 to S7  
Tables S1 to S6  
Legend for data S1

**Other Supplementary Material for this manuscript includes the following:**

Data S1

**Fig. S1.** The relationship between the 20 allometric equations found to estimate AGC (Table S1) and the one provided by ref. (1). The y-axis is the natural logarithmic of the estimate provided by ref. (1) formula and the x-axis is the natural logarithmic of the aboveground carbon of each allometric equation. We present the mean prediction of the linear regression model (in blue) and the associated  $R^2$  of the model.

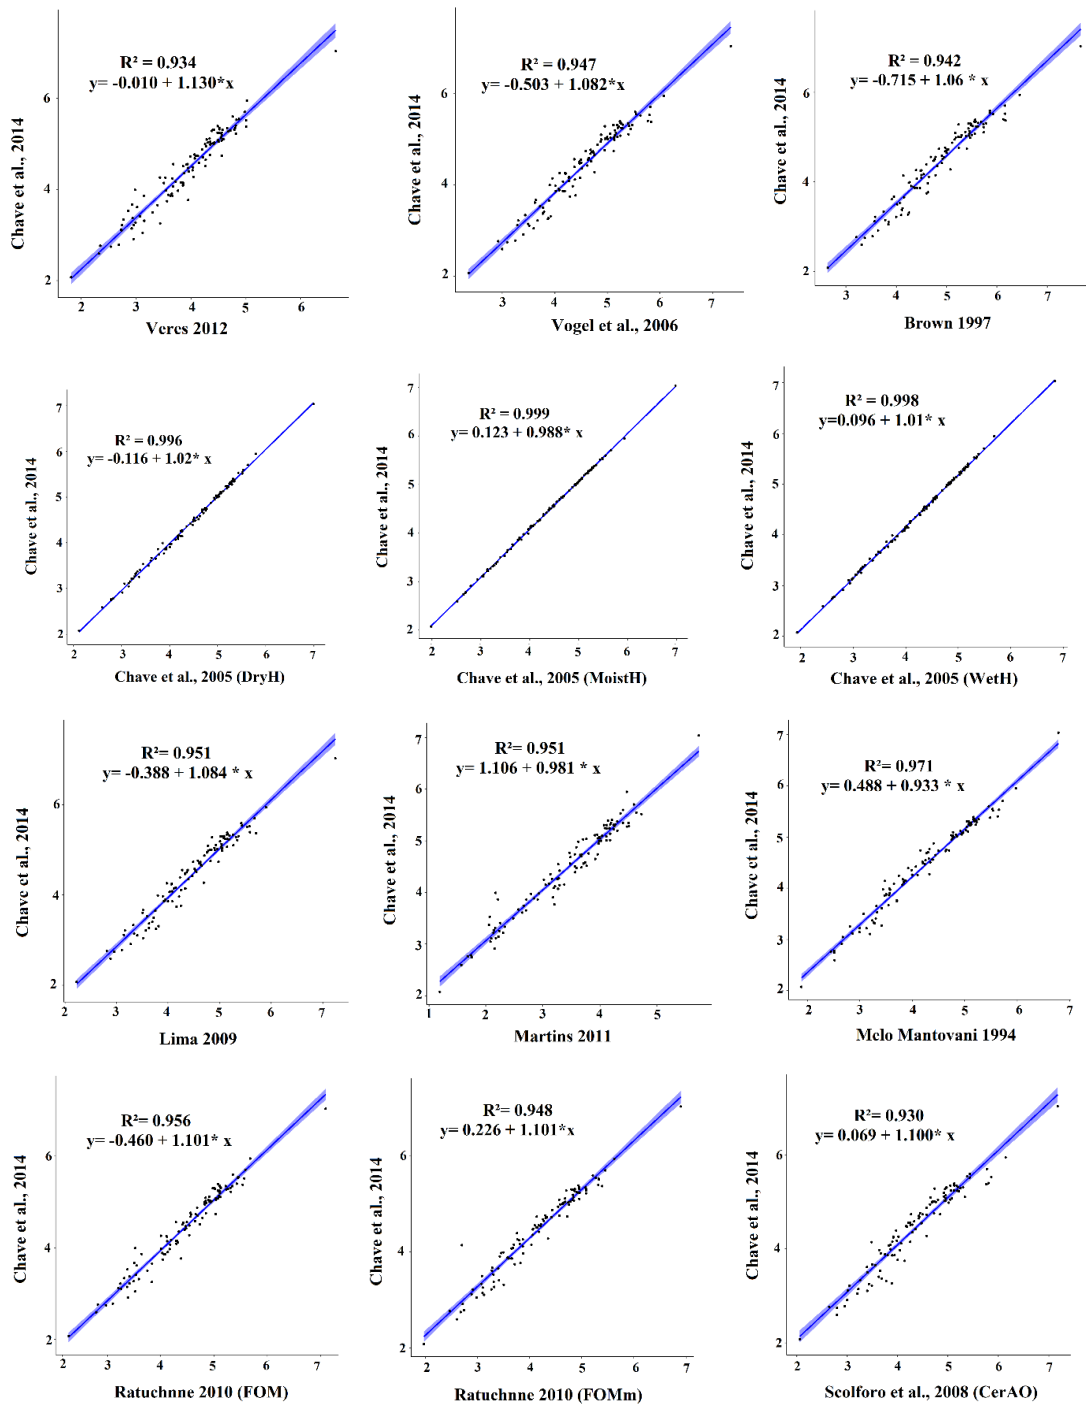

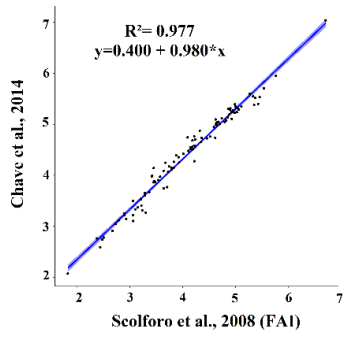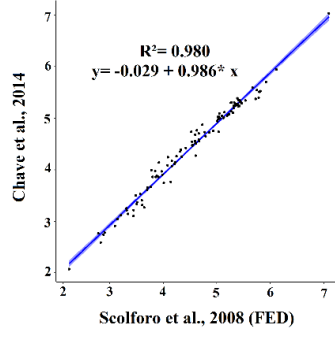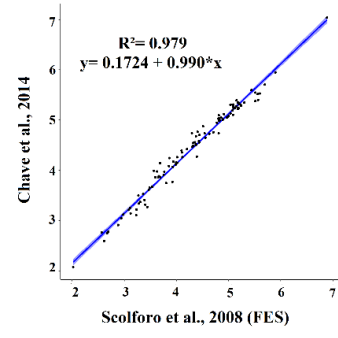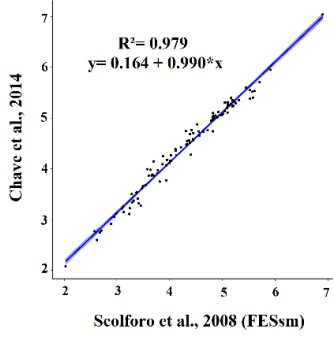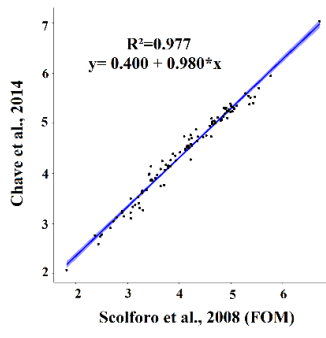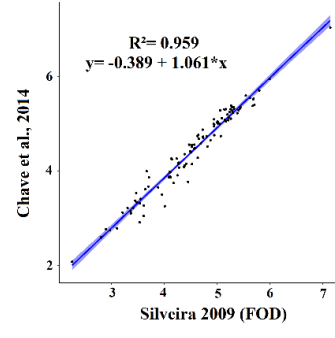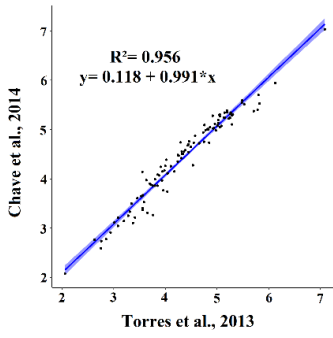

**Fig. S2.** Carbon equations residual plots. Smoothers between residuals and fitted values from different models tested to find the best description of the relationship between above-ground carbon (AGC; estimated by ref. (1)) and basal area (BA) based on from 527 inventories reporting both AGC and BA estimates.

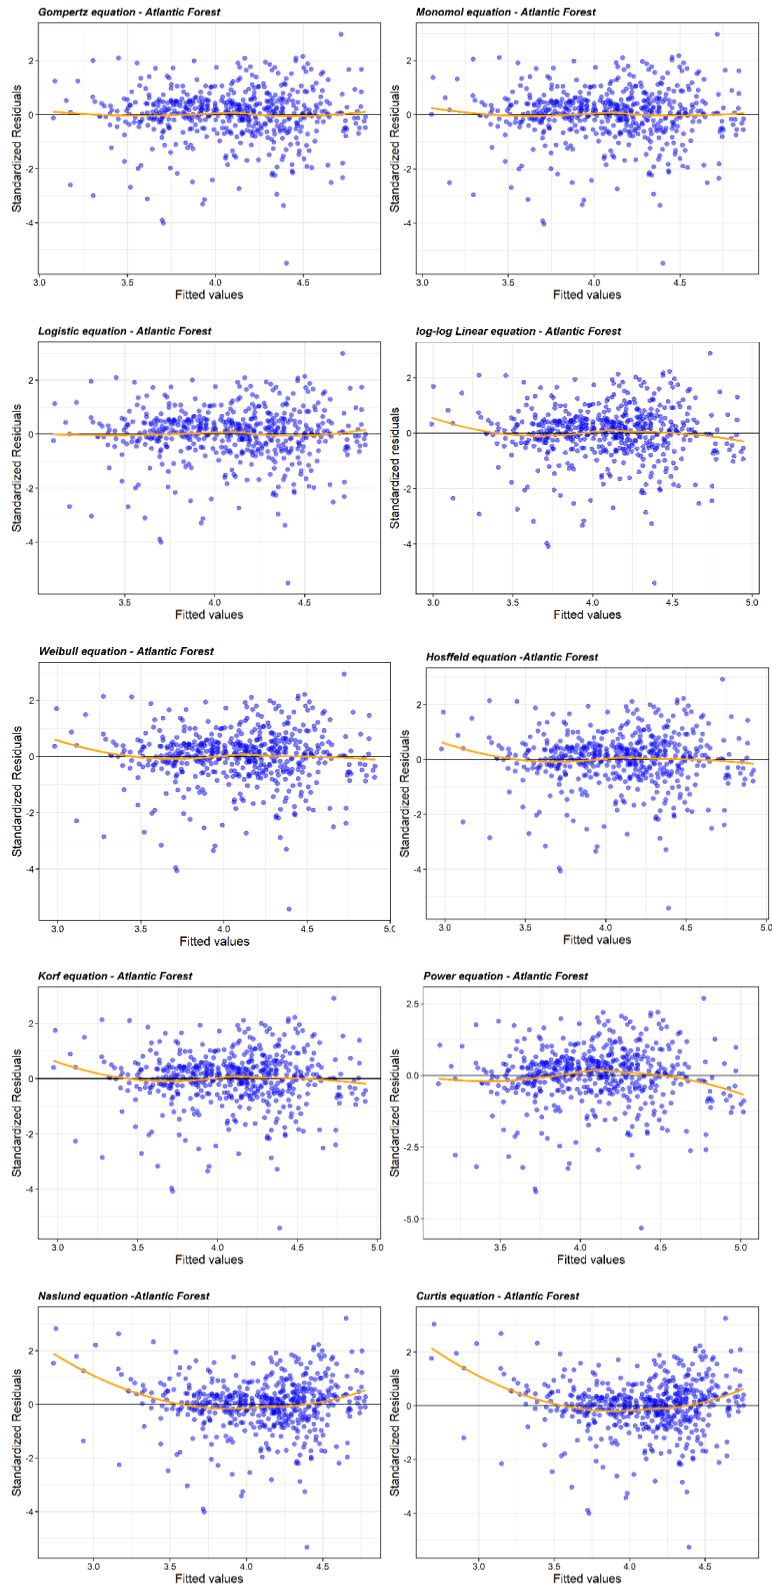

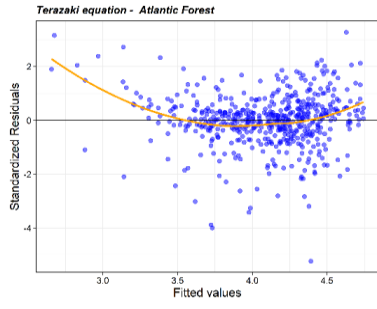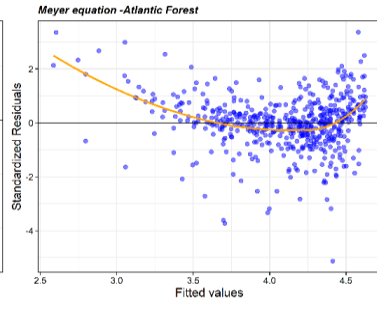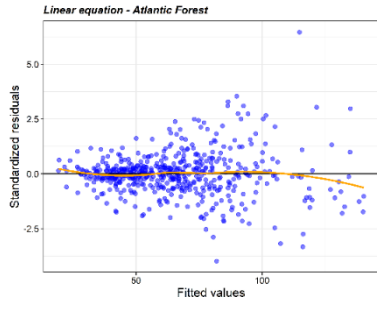

**Fig. S3.** The relationship between above-ground carbon and basal area for 527 forest inventories. Values of above-ground carbon were obtained from values of above-ground biomass estimated using the allometric equation provided by ref.(1)). The green line is the fit of the Gompertz equation, whose parameter estimates, explanatory power ( $R^2$ ) and standard residual error (%) are provided. Points represents the values for each inventory.

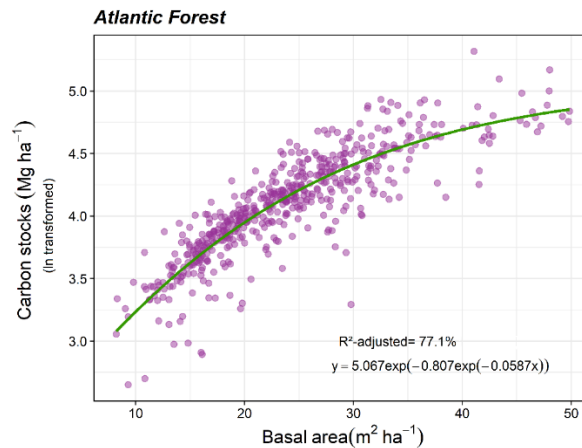

**Figure S4:** An a priori model of the causal relationships among climate, soil properties, topography, human impacts, tree community properties, and aboveground carbon storage (AGC) in Atlantic Forest. We hypothesize that effect of human impacts is negative, the soil properties is positive and the climate, slope declivity and field sampling methods can be positive or negative depending on the evaluated variable. Taller and hard wood species and taxonomic and functional diversity increases the carbon stocks.

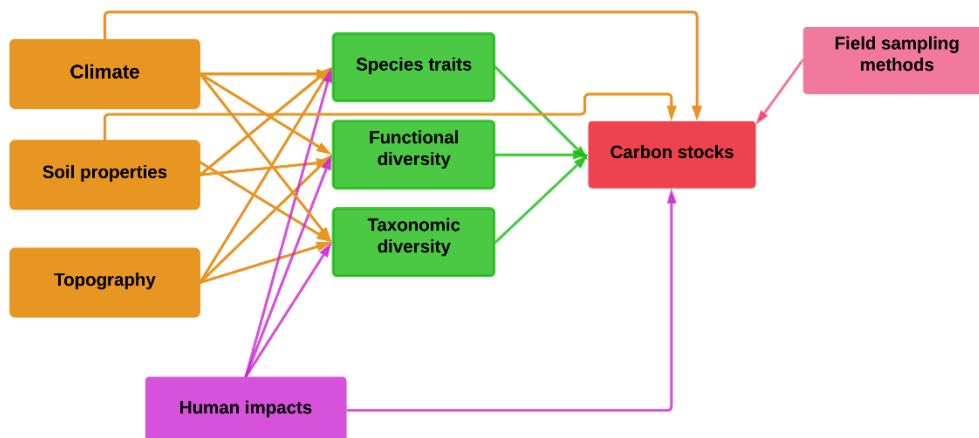

**Figure S5:** Correlation matrix between potential carbon stocks drivers. Wg\_gcm3\_log (CWM wood density log transformed), MaxHeight\_m\_log (CWM Maximum height log transformed), FEve.n (Functional evenness), FDiv.n (Functional divergence), FRic.n (Functional richness), PAR (perimeter area ratio), DBH\_inclusion\_c (Dbh cutoff criterion), Ridit\_DL (Within fragment disturbance level), MAT (Mean annual temperature), ppt (Mean annual precipitation), CWD\_T (Climatic water deficit -1 transformed), frag\_area (Fragment size), mean.patch\_area (Mean fragment size), DECLIV (Slope declivity), Soil.Quality\_T (soil quality), LeafArea\_log (CWM Leaf area log transformed) and SeedMass\_g\_log (CWD seed mass log transformed).

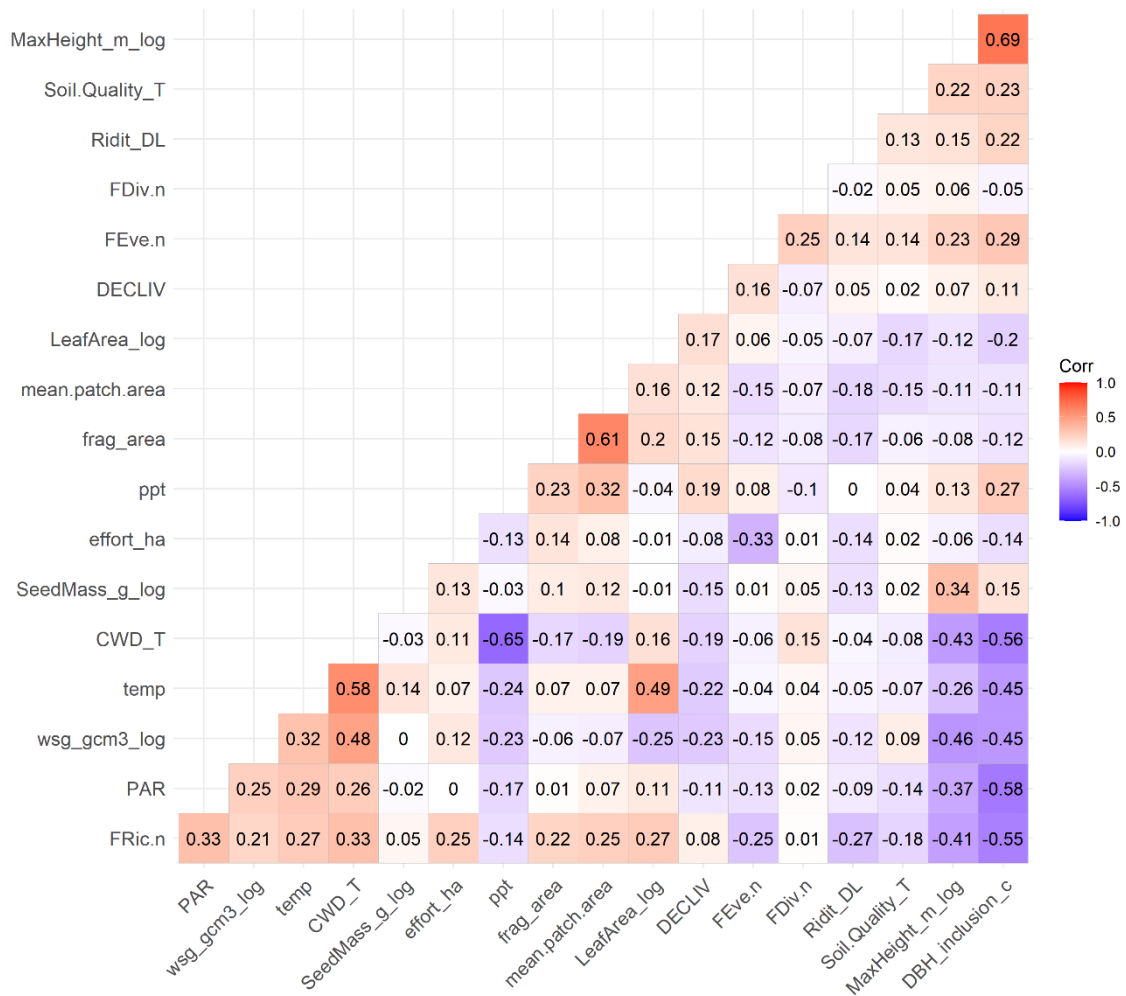

**Figure S6: Causal mediation analysis in its simplest form.**  $a'$  = effect of X on Y;  $b'$  = effect of X on M,  $b'c'$  = effect of X on Y mediated by M.

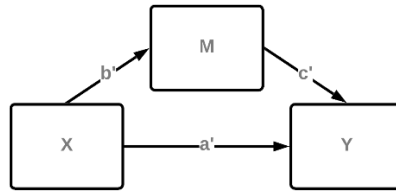



**Figure S7:** Residual plots. (A) AGC main drivers' model (Table S1 and Fig 1). (B-F) Causal mediation models (Table S4).

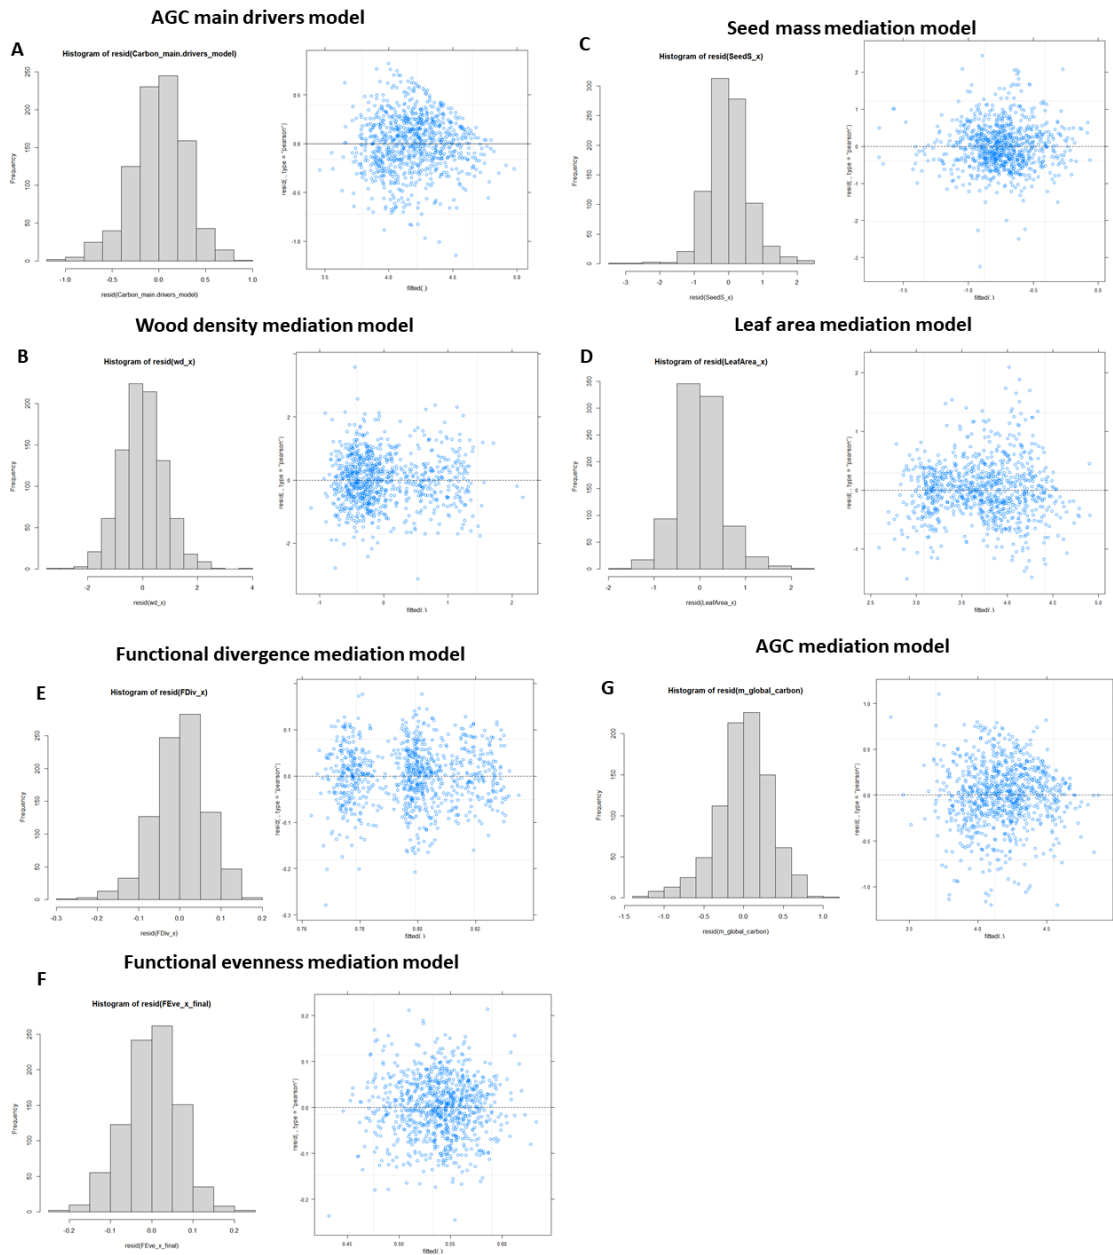

**Table S1: Standardized coefficients and partial pseudo-R<sup>2</sup> of model-averaged of AGC main drivers model of Atlantic Forest.** Model averaging was developed with all candidate models that presented  $\Delta AICc \leq 4$ . Note: AGC (Above-ground carbon stocks); SE (standard error).

| $\text{Log(AGC)} \sim \text{scale(FRic.n)} + \text{scale(effort\_ha)} + \text{scale(DBH\_inclusion\_c)} +$<br>$\text{scale(PAR)} + \text{scale(log(LeafArea))} + \text{scale(FDiv.n)} + \text{scale(FEve.n)} + \text{scale(log(SeedMass\_g))} +$<br>$\text{scale(log(wsg\_gcm3))} + \text{scale(log(MaxHeight\_m))} + \text{scale(mean.patch.area)} + \text{scale(frag\_area)}$<br>$+ \text{scale(Frag\_Dist\_L)} + \text{scale(CWD\_T)} + \text{scale(temp)} + \text{scale(Soil.Quality\_T)} + \text{scale(Slope)} +$<br>$(1 ecoreg)$ |                                         |          |       |                |                                   |
|----------------------------------------------------------------------------------------------------------------------------------------------------------------------------------------------------------------------------------------------------------------------------------------------------------------------------------------------------------------------------------------------------------------------------------------------------------------------------------------------------------------------------------------|-----------------------------------------|----------|-------|----------------|-----------------------------------|
| Variable Code                                                                                                                                                                                                                                                                                                                                                                                                                                                                                                                          | Drivers                                 | Estimate | SE    | <i>p-value</i> | partial pseudo-R <sup>2</sup> (%) |
|                                                                                                                                                                                                                                                                                                                                                                                                                                                                                                                                        | Intercept                               | 4.132    | 0.054 | <0.0001        |                                   |
| Frag_Dist_L                                                                                                                                                                                                                                                                                                                                                                                                                                                                                                                            | Within fragment disturbance level       | -0.128   | 0.010 | <0.0001        | 12.24                             |
| FEve.n                                                                                                                                                                                                                                                                                                                                                                                                                                                                                                                                 | Functional evenness                     | -0.075   | 0.011 | <0.0001        | 3.97                              |
| CWD_T                                                                                                                                                                                                                                                                                                                                                                                                                                                                                                                                  | Climatic water deficit (-1 transformed) | -0.026   | 0.019 | 0.174          | 0.30                              |
| temp                                                                                                                                                                                                                                                                                                                                                                                                                                                                                                                                   | Mean annual temperature                 | -0.098   | 0.015 | <0.0001        | 3.97                              |
| DBH_inclusion_c                                                                                                                                                                                                                                                                                                                                                                                                                                                                                                                        | Dbh cutoff criteria                     | -0.052   | 0.017 | 0.002          | 0.97                              |
| Soil.Quality_T                                                                                                                                                                                                                                                                                                                                                                                                                                                                                                                         | Soil quality                            | -0.017   | 0.010 | 0.110          | 0.25                              |
| Slope                                                                                                                                                                                                                                                                                                                                                                                                                                                                                                                                  | Slope declivity                         | -0.001   | 0.011 | 0.921          | 0.00                              |
| FRic.n                                                                                                                                                                                                                                                                                                                                                                                                                                                                                                                                 | Functional richness                     | 0.016    | 0.013 | 0.234          | 0.15                              |
| SeedMass_g                                                                                                                                                                                                                                                                                                                                                                                                                                                                                                                             | CWM Seed mass                           | 0.079    | 0.010 | <0.0001        | 4.88                              |
| frag_area                                                                                                                                                                                                                                                                                                                                                                                                                                                                                                                              | Fragment size                           | 0.029    | 0.011 | 0.007          | 0.73                              |
| FDiv.n                                                                                                                                                                                                                                                                                                                                                                                                                                                                                                                                 | Functional divergence                   | 0.044    | 0.010 | <0.0001        | 1.71                              |
| mean.patch.area                                                                                                                                                                                                                                                                                                                                                                                                                                                                                                                        | Mean fragment size                      | 0.033    | 0.011 | 0.002          | 0.90                              |
| LeafArea                                                                                                                                                                                                                                                                                                                                                                                                                                                                                                                               | CWM Leaf area                           | 0.036    | 0.014 | 0.011          | 0.64                              |
| wsg_gcm3                                                                                                                                                                                                                                                                                                                                                                                                                                                                                                                               | CWM Wood density                        | 0.054    | 0.013 | <0.0001        | 1.56                              |
| PAR                                                                                                                                                                                                                                                                                                                                                                                                                                                                                                                                    | Perimeter-area ratio                    | 0.057    | 0.012 | <0.0001        | 2.06                              |
| MaxHeight_m                                                                                                                                                                                                                                                                                                                                                                                                                                                                                                                            | Maximum tree height                     | 0        | 0     | 0              | 0.00                              |
| effort_ha                                                                                                                                                                                                                                                                                                                                                                                                                                                                                                                              | Sampling effort                         | -0.020   | 0.010 | 0.059          | 0.35                              |

**Table S2: The carbon estimate  $\pm$  standard error (SE) from optimum linear mixed model** (Fig.2 and Table S1). Note: Within fragment disturbance level is shown here as a categorical variable (i.e., without Ridit score transformation).

| Within Disturbance levels | Estimate | SE    | df     |
|---------------------------|----------|-------|--------|
| Low                       | 72.399   | 4.574 | 8.939  |
| Medium                    | 69.838   | 4.231 | 7.613  |
| High                      | 55.056   | 3.326 | 7.455  |
| Heavy                     | 48.241   | 5.225 | 75.295 |

**Table S3:** Tukey test results from generalized linear mixed models testing effects of within fragment disturbances on carbon stocks (AGC).

| <b>Within disturbances levels</b> | <b><i>p</i>-value</b> |
|-----------------------------------|-----------------------|
| Low - Medium                      | 0.595                 |
| Low - High                        | <.0001*               |
| Low - Heavy                       | <.0001*               |
| Medium - High                     | <.0001*               |
| Medium - Heavy                    | <.0001*               |
| High - Heavy                      | 0.445                 |

"" p-value > 0.05, significant values

**Table S4: Causal mediation analysis models.** The estimated coefficients  $\pm$  standard error (SE) from multiple linear mixed models, testing the effects of human impacts (mean fragment size and forest degradation level) and environmental conditions (climate, slope declivity and soil quality) on functional traits (wood density -WD, Seed mass and Leaf area) and functional diversity (functional richness – FRic, functional evenness -FEve and functional divergence -FDiv). Note: MAT (Mean annual temperature), CWD (climatic water deficit), MEMs: Moran’s eigenvector maps, spatial filters. Climatic water deficit was -1 transformed and AGC, WD, seed mass and leaf area were transformed in the natural logarithmic scale. All models were fitted with scaled drivers.

| a) Wood density mediation model        |          |        |                | b) Seed Mass mediation model             |          |        |                |
|----------------------------------------|----------|--------|----------------|------------------------------------------|----------|--------|----------------|
|                                        | Estimate | SE     | <i>p-value</i> |                                          | Estimate | SE     | <i>p-value</i> |
| Intercept                              | -0.4869  | 0.0166 | <0.0001        | Intercept                                | -0.7511  | 0.1159 | 0.0004         |
| Within fragment disturbance level      | -0.0091  | 0.0024 | 0.0002         | Within fragment disturbance level        | -0.0885  | 0.0211 | <0.0001        |
| Mean fragment size                     | 0.0073   | 0.0026 | 0.0054         | Mean fragment size                       | 0.0487   | 0.0225 | 0.0308         |
| Slope declivity                        | -0.0092  | 0.0025 | 0.0002         | Slope declivity                          | -0.0912  | 0.0215 | <0.0001        |
| Soil quality                           | 0.0079   | 0.0025 | 0.0017         | Soil quality                             | 0.0343   | 0.0217 | 0.1138         |
| MAT                                    | 0.0061   | 0.0034 | 0.0750         | MAT                                      | 0.1611   | 0.0294 | <0.0001        |
| CWD                                    | 0.0345   | 0.0046 | <0.0001        | CWD                                      | -0.1002  | 0.0387 | 0.0103         |
| Model R <sup>2</sup>                   | 0.207    |        |                | Model R <sup>2</sup>                     | 0.088    |        |                |
| Degrees of freedom                     | 111.25   |        |                | Degrees of freedom                       | 111.25   |        |                |
| Moran I statistic standard deviate     |          |        | 0.1791         | Moran I statistic standard deviate       |          |        | 0.4303         |
| c) Leaf area mediation model           |          |        |                | d) Functional divergence mediation model |          |        |                |
|                                        | Estimate | SE     | <i>p-value</i> |                                          | Estimate | SE     | <i>p-value</i> |
| Intercept                              | 3.6961   | 0.1019 | <0.0001        | Intercept                                | 0.7895   | 0.0072 | <0.0001        |
| Within fragment disturbance level      | -0.0120  | 0.0171 | 0.4833         | Within fragment disturbance level        | -0.0024  | 0.0021 | 0.2696         |
| Mean fragment size                     | -0.0246  | 0.0182 | 0.1771         | Mean fragment size                       | 0.0001   | 0.0023 | 0.9634         |
| Slope declivity                        | 0.1545   | 0.0174 | <0.0001        | Slope declivity                          | -0.0013  | 0.0022 | 0.5586         |
| Soil quality                           | -0.0377  | 0.0175 | 0.0319         | Soil quality                             | 0.0012   | 0.0022 | 0.5864         |
| MAT                                    | 0.3129   | 0.0238 | <0.0001        | MAT                                      | 0.0008   | 0.0030 | 0.7666         |
| CWD                                    | -0.0938  | 0.0317 | 0.0033         | CWD                                      | 0.0073   | 0.0036 | 0.0468         |
| Model R <sup>2</sup>                   | 0.208    |        |                | Model R <sup>2</sup>                     | 0.017    |        |                |
| Degrees of freedom                     | 111.25   |        |                | Degrees of freedom                       | 111.25   |        |                |
| Moran I statistic standard deviate     |          |        | 0.9266         | Moran I statistic standard deviate       |          |        | 0.6942         |
| e) Functional evenness mediation model |          |        |                | f) AGC stocks mediation model            |          |        |                |
|                                        | Estimate | SE     | <i>p-value</i> |                                          | Estimate | SE     | <i>p-value</i> |
| Intercept                              | 0.5245   | 0.0102 | <0.0001        | Intercept                                | 4.1420   | 0.0526 | <0.0001        |
| Within fragment disturbance level      | 0.0061   | 0.0022 | 0.0074         | Within fragment disturbance level        | -0.1272  | 0.0106 | <0.0001        |
| Mean fragment size                     | -0.0089  | 0.0024 | 0.0002         | Mean fragment size                       | 0.0329   | 0.0114 | 0.0040         |
| Slope declivity                        | 0.0132   | 0.0023 | <0.0001        | Slope declivity                          | -0.0036  | 0.0111 | 0.7464         |
| Soil quality                           | 0.0040   | 0.0023 | 0.0866         | Soil quality                             | -0.0191  | 0.0108 | 0.0789         |
| MAT                                    | 0.0102   | 0.0032 | 0.0015         | MAT                                      | -0.0975  | 0.0164 | <0.0001        |
| CWD                                    | -0.0069  | 0.0040 | 0.0870         | CWD                                      | -0.0253  | 0.0197 | 0.2008         |
| MEM10                                  | -0.0104  | 0.0022 | <0.0001        | Wood density                             | 0.0642   | 0.0142 | <0.0001        |
| MEM15                                  | 0.0071   | 0.0022 | 0.0017         | Tree Maximum Height                      | 0.0265   | 0.0154 | 0.0863         |
| MEM86                                  | 0.0072   | 0.0022 | 0.0010         | Leaf area                                | 0.0383   | 0.0147 | 0.0093         |
| MEM3                                   | -0.0133  | 0.0030 | <0.0001        | Seed mass                                | 0.0721   | 0.0116 | <0.0001        |
| MEM14                                  | 0.0075   | 0.0022 | 0.0008         | Functional richness                      | 0.0193   | 0.0136 | 0.1546         |
|                                        |          |        |                | Functional evenness                      | -0.0755  | 0.0118 | <0.0001        |

|                                    |        |                                    |         |        |         |
|------------------------------------|--------|------------------------------------|---------|--------|---------|
|                                    |        | Functional divergence              | 0.0431  | 0.0105 | <0.0001 |
|                                    |        | PAR                                | 0.0552  | 0.0123 | <0.0001 |
|                                    |        | DBH cutoff                         | -0.0614 | 0.0189 | 0.0012  |
|                                    |        | Sampling effort                    | -0.0211 | 0.0108 | 0.0516  |
| Model R <sup>2</sup>               | 0.144  | Model R <sup>2</sup>               | 0.367   |        |         |
| Degrees of freedom                 | 68.461 | Degrees of freedom                 | 49.44   |        |         |
| Moran I statistic standard deviate |        | Moran I statistic standard deviate |         |        | 0.7696  |

**Table S5. List of the all allometric equations reported in the forest inventories used for data analysis.** AGB= Above-ground biomass, H= Height of the tree, DBH= diameter at breast height, WD= wood density and DW= Dry weight.

| Allometric equations                                                                                                                                               |
|--------------------------------------------------------------------------------------------------------------------------------------------------------------------|
| $AGB=0.0673*(WD*(DBH^2)*H)^{(0.976)}$                                                                                                                              |
| $AGB=0.033430*(DBH^{2.397902})*(H^{0.426536})$                                                                                                                     |
| $AGB=\exp(-2.289+2.649*\ln(DBH)-0.021*(\ln(DBH))^2)$                                                                                                               |
| $AGB=\exp(-2.187+0.916*\ln(WD*(DBH^2)*H))$                                                                                                                         |
| $AGB=\exp(-2.977+\ln(WD*(DBH^2)*H))$                                                                                                                               |
| $AGB=\exp(-2.557+0.940*\ln(WD*(DBH^2)*H))$                                                                                                                         |
| $DW=(59.321357)+(-12.28289)*DBH+(0.8396136)*(DBH^2)$                                                                                                               |
| $AGB=0.04821*(DAP^{1.34374})*(H^{1.26829})$                                                                                                                        |
| $\ln(AGB)=-4.15190+1.06068*\ln((DBH^2)*H)$                                                                                                                         |
| $AGB=0.317*(DBH^2)+0.009*((DBH^2)*H)$                                                                                                                              |
| $AGB=-3.025*DBH+0.425*(DBH^2)+0.006*((DBH^2)*H)$                                                                                                                   |
| $AGB=\exp(-10.8771683824+2.6359736325*\ln(DBH)+0.0878059946*\ln(H))/(0.4802)$                                                                                      |
| $AGB=\exp(-11.319842099+2.1415723631*\ln(DBH)+0.8134282561*\ln(H))/(0.4833)$                                                                                       |
| $AGB=\exp(-10.7501678493+2.0580637328*\ln(DBH)+0.8604515609*\ln(H))/(0.4860)$                                                                                      |
| $AGB=\exp(-10.9520199234+2.0898526615*\ln(DBH)+0.8096162241*\ln(H))/(0.4839)$                                                                                      |
| $AGB=\exp(-10.9520199234+2.0898526615*\ln(DBH)+0.8096162241*\ln(H))/(0.4802)$                                                                                      |
| $AGB=\exp(-11.319842099+2.1415723631*\ln(DBH)+0.8134282561*\ln(H))/(0.4833)$                                                                                       |
| $AGB=25.87071+0.02909*(DBH^2)-0.21382*(H^2)+0.03189*(DBH^2)*H$                                                                                                     |
| $AGB = 0.024530*(DAP^{2.443356})*(H^{0.423602}) +$<br>$0.2596*(0.024530*(DAP^{2.443356})*(H^{0.423602})) +$<br>$0.0445*(0.024530*(DAP^{2.443356})*(H^{0.423602}))$ |
| $AGB=(-4.8639)+0.3981*DBH+0.2625*(DBH^2)$                                                                                                                          |
| $\log_{10}(AGB)=-0.88239023+2.40959057*\log_{10}(DBH)$                                                                                                             |

**Table S6. Performance of carbon equations based on basal area.** Comparison of the equations used to find the best description for the relationship between above-ground carbon (AGC; estimated by ref.1) and basal area (BA) based on from 527 inventories reporting both estimates. Best equation (i.e Gompertz equation) was selected based on the lowest AIC value and are shown in **bold**.

|                          |                                                                                                | Akaike value    |
|--------------------------|------------------------------------------------------------------------------------------------|-----------------|
| <b>Gompertz equation</b> | <b><math>\log_{10}(\text{AGC}) \sim A \cdot \exp(-c \cdot \exp(-k \cdot \text{BA}))</math></b> | <b>-184.821</b> |
| Monomol equation         | $\log_{10}(\text{AGC}) \sim A \cdot (1 - c \cdot \exp(-k \cdot \text{BA}))$                    | -184.783        |
| Log-Log linear equation  | $\log_{10}(\text{AGC}) \sim \log_{10}(\text{BA})$                                              | -183.039        |
| Weibull equation         | $\log_{10}(\text{AGC}) \sim A \cdot (1 - \exp(-k \cdot \text{BA}^c))$                          | -182.772        |
| Hosffeld equation        | $\log_{10}(\text{AGC}) \sim A / (1 + c \cdot \exp(-k \cdot \ln(\text{BA})))$                   | -182.287        |
| Korf equation            | $\log_{10}(\text{AGC}) \sim A \cdot \exp(-k / \text{BA}^c)$                                    | -181.787        |
| Power equation           | $\log_{10}(\text{AGC}) \sim A \cdot (\text{BA}^k)$                                             | -174.293        |
| Naslund equation         | $\log_{10}(\text{AGC}) \sim \text{BA} / (A \cdot \text{BA} + k)^2$                             | -160.107        |
| Curtis equation          | $\log_{10}(\text{AGC}) \sim A \cdot (\text{BA} / (1 + \text{BA}))$                             | -150.323        |
| Terazaki equation        | $\log_{10}(\text{AGC}) \sim A \cdot \exp(-k / \text{BA})$                                      | -144.777        |
| Meyer equation           | $\log_{10}(\text{AGC}) \sim A \cdot (1 - \exp(-k \cdot \text{BA}))$                            | -102.209        |
| Linear equation          | $\text{AGC} \sim \text{BA}$                                                                    | 4268.906        |

## Supplementary Text

### Indirect effect explanation in causal mediation analysis

Suppose you have  $Y$  as your response variable,  $T$  as your predictor (with levels 0 and 1) and  $M$  as a mediator variable (with levels 0 and 1).  $M_i(t)$  denotes the potential value of a mediator under the treatment status  $T_i = t$ .  $Y_i(t, m)$  denote the potential outcome when  $T$  and  $M$  variables equal  $t$  and  $m$ , respectively. So the observed outcome,  $Y_i$ , equals  $Y_i(T_i, M_i(T_i))$  where  $M_i(T_i)$  represents the observed value of the mediator  $M_i$  at  $T_i$ .

The indirect effect is represented by:

$$\text{Indirect effect (t)} \equiv Y_i(t, M_i(1)) - Y_i(t, M_i(0))$$

Thus, the indirect effect (causal mediation effect) is the expected change in  $Y$  when the mediator took the value that would realize under another level of  $T$  ( $M_i(T_i)$ ) while  $T$  is hold constant ( $t$ ).

The package use simulation to calculate confidence intervals around the coefficient. More details at the package documentation (<https://cran.r-project.org/web/packages/mediation/vignettes/mediation.pdf>) and in refs (74,75).

## Supplementary data

**Supplementary Data 1: Pre-selection of co-variables.** The full co-variables and models used for selected the main drivers of carbon stocks.
